# Supplementary material
Source: PubMed Central journal article supplement (PMC3462448)

## Supporting information for

### Effects of Hapten Density on the Induced Antibody Repertoire

Qian Li,<sup>[a]</sup> Luis G. Rodriguez,<sup>[b]</sup> David F. Farnsworth,<sup>[a]</sup> and Jeffrey C. Gildersleeve\*<sup>[a]</sup>

<sup>[a]</sup> Chemical Biology Laboratory, National Cancer Institute, 376 Boyles St., Frederick, MD 21702  
[gildersj@mail.nih.gov](mailto:gildersj@mail.nih.gov)

<sup>[b]</sup> Optical Microscopy and Analysis Laboratory, SAIC-Frederick, Inc., Advanced Technology Program, NCI-Frederick, Frederick, MD 21702

**Table S1. List of Components on the Array and Abbreviations<sup>1</sup>**

| Group         | Abbreviation                                                          | Description                                                                                        |
|---------------|-----------------------------------------------------------------------|----------------------------------------------------------------------------------------------------|
| Carbohydrates | 3'SLacNac                                                             | Sialyl $\alpha$ 2-3Gal $\beta$ 1-4GlcNac – BSA                                                     |
|               | 6'Slac                                                                | Sialyl $\alpha$ 2-3Gal $\beta$ 1-4Glc-APD-HSA                                                      |
|               | Adi - 04                                                              | GalNAc $\alpha$ 1-3Gal $\beta$ -BSA (4/BSA)                                                        |
|               | Adi - 17                                                              | GalNAc $\alpha$ 1-3Gal $\beta$ -BSA (17/BSA)                                                       |
|               | alphaGal                                                              | Gal $\alpha$ 1-3Gal $\beta$ 1-4GlcNac-BSA                                                          |
|               | Ara5                                                                  | Ara $\alpha$ 1-5Ara $\alpha$ 1-5Ara $\alpha$ 1-5Ara $\alpha$ 1-5Ara $\alpha$ 1-BSA                 |
|               | Bdi                                                                   | Gal $\alpha$ 1-3Gal- BSA                                                                           |
|               | BG-A                                                                  | GalNAc $\alpha$ 1-3(Fuc $\alpha$ 1-2)Gal $\beta$ - BSA                                             |
|               | BG-A1                                                                 | GalNAc $\alpha$ 1-3(Fuc $\alpha$ 1-2)Gal $\beta$ 1-3GlcNac $\beta$ 1-3Gal $\beta$ 1-4(Glc)-APD-HSA |
|               | BG-B (Dextra)                                                         | Gal $\alpha$ 1-3(Fuc $\alpha$ 1-2)Gal $\beta$ -BSA from Dextra                                     |
|               | BG-B (EMD)                                                            | Gal $\alpha$ 1-3(Fuc $\alpha$ 1-2)Gal $\beta$ -BSA from EMD                                        |
|               | BG-H1                                                                 | Fuc $\alpha$ 1-2Gal $\beta$ 1-3GlcNac $\beta$ 1-3Gal $\beta$ 1-4Glc $\beta$ -APD-HSA               |
|               | BG-H2                                                                 | Fuc $\alpha$ 1-2Gal $\beta$ 1-4GlcNac $\beta$ -HSA                                                 |
|               | Cellobiose                                                            | Glc $\beta$ 1-4Glc $\beta$ -BSA                                                                    |
|               | Celotriose                                                            | Glc $\beta$ 1-4Glc $\beta$ 1-4Glc $\beta$ -BSA                                                     |
|               | Chito 3                                                               | GlcNac $\beta$ 1-4GlcNac $\beta$ 1-4GlcNac $\beta$ -BSA (8/BSA)                                    |
|               | Chito 3 - 20                                                          | GlcNac $\beta$ 1-4GlcNac $\beta$ 1-4GlcNac $\beta$ -BSA (20/BSA)                                   |
|               | DSLNT                                                                 | Sia $\alpha$ 2-3Gal $\beta$ 1-3(Sia $\alpha$ 2-6)GlcNac $\beta$ 1-3Gal $\beta$ 1-BSA               |
|               | Forssman Di - 04                                                      | GalNAc $\alpha$ 1-3GalNAc $\beta$ 1-BSA (4/BSA)                                                    |
|               | Forssman Di - 21                                                      | GalNAc $\alpha$ 1-3GalNAc $\beta$ 1-BSA (21/BSA)                                                   |
|               | Forssman Di - 31                                                      | GalNAc $\alpha$ 1-3GalNAc $\beta$ 1-BSA (31/BSA)                                                   |
|               | Fuc-a                                                                 | Fuc- $\alpha$ - BSA (22/BSA)                                                                       |
|               | Fuc-a 04                                                              | Fuc- $\alpha$ - BSA (4/BSA)                                                                        |
|               | Fuc-b - 04                                                            | Fuc- $\beta$ - BSA (4/BSA)                                                                         |
|               | Fuc-b - 22                                                            | Fuc- $\beta$ - BSA (22/BSA)                                                                        |
|               | G2M4                                                                  | Man $\beta$ 1-4(Gal $\alpha$ 1-6)Man $\beta$ 1-4(Gal $\alpha$ 1-6)Man $\beta$ 1-4Man $\beta$ 1-BSA |
|               | GA1 - 06                                                              | Gal $\beta$ 1-3GalNAc $\beta$ 1-4Gal $\beta$ 1-BSA (GA1tri or asialo-GM1; 6/BSA)                   |
|               | GA1 - 20                                                              | Gal $\beta$ 1-3GalNAc $\beta$ 1-4Gal $\beta$ 1-BSA (GA1tri or asialo-GM1; 20/BSA)                  |
|               | GA1di                                                                 | Gal $\beta$ 1-3GalNAc $\beta$ – HSA                                                                |
|               | GA2di - 04                                                            | GalNAc $\beta$ 1-4Gal $\beta$ - BSA (GA2di or asialo-GM2; 4/BSA)                                   |
|               | GA2di - 16                                                            | GalNAc $\beta$ 1-4Gal $\beta$ - BSA (GA2di or asialo-GM2; 16/BSA)                                  |
|               | GA2di - 37                                                            | GalNAc $\beta$ 1-4Gal $\beta$ - BSA (GA2di or asialo-GM2; 37/BSA)                                  |
|               | GA2di - accurate                                                      | GalNAc $\beta$ 1-4Gal $\beta$ - BSA (from accurate chemicals)                                      |
|               | Gal3                                                                  | Gal $\alpha$ 1-3Gal $\beta$ 1-4Gal $\alpha$ -BSA (Gal3)                                            |
|               | Gal-a                                                                 | Gal- $\alpha$ - BSA                                                                                |
|               | Gala1-4Galb                                                           | Gal $\alpha$ 1-4Gal $\beta$ -CETE-BSA                                                              |
|               | Gal-b                                                                 | Gal- $\beta$ - BSA                                                                                 |
|               | Galb1-6Man-a                                                          | Gal $\beta$ 1-6Man- $\alpha$ - BSA                                                                 |
|               | GalNAc-a - 04                                                         | GalNAc- $\alpha$ - BSA (4/BSA)                                                                     |
|               | GalNAc-a - 22                                                         | GalNAc- $\alpha$ - BSA (22/BSA)                                                                    |
|               | GalNAca1-6Galb - 04                                                   | GalNAc $\alpha$ 1-6Gal $\beta$ -BSA (4/BSA)                                                        |
|               | GalNAca1-6Galb - 21                                                   | GalNAc $\alpha$ 1-6Gal $\beta$ -BSA (21/BSA)                                                       |
|               | GalNAc-b                                                              | GalNAc- $\beta$ - BSA                                                                              |
|               | Gb4                                                                   | GalNAc $\beta$ 1-3Gal $\alpha$ 1-4Gal $\beta$ 1-BSA                                                |
|               | Glc-a                                                                 | Glc- $\alpha$ - BSA                                                                                |
|               | Glc $\alpha$ 1-6Glc $\alpha$ 1-4Glc $\alpha$ 1-4Glc $\beta$ -CETE-BSA | Glc $\alpha$ 1-6Glc $\alpha$ 1-4Glc $\alpha$ 1-4Glc $\beta$ -CETE-BSA                              |
|               | Glc-b                                                                 | Glc- $\beta$ - BSA                                                                                 |

| Group | Abbreviation                 | Description                                                                                                                                                      |
|-------|------------------------------|------------------------------------------------------------------------------------------------------------------------------------------------------------------|
|       | GlcNAc $\alpha$ 1-4Galb      | GlcNAc $\alpha$ 1-4Gal $\beta$ -BSA (20/BSA)                                                                                                                     |
|       | GlcNAc $\alpha$ 1-4Galb - 03 | GlcNAc $\alpha$ 1-4Gal $\beta$ -BSA (3/BSA)                                                                                                                      |
|       | GlcNAc-b                     | GlcNAc- $\beta$ - BSA                                                                                                                                            |
|       | GM1                          | Gal $\beta$ 1-3GalNAc $\beta$ 1-4(Sia $\alpha$ 2-3)Gal $\beta$ -4Glc-HSA                                                                                         |
|       | GM3                          | Sialyl $\alpha$ 2-3Gal $\beta$ 1-4Glc-APD-HSA                                                                                                                    |
|       | Isomaltose                   | Glc $\alpha$ 1-6Glc $\beta$ -BSA                                                                                                                                 |
|       | LacNAc                       | Gal $\beta$ 1-4GlcNAc - BSA                                                                                                                                      |
|       | LacNAc (trimeric)            | Gal $\beta$ 1-4GlcNAc $\beta$ 1-3Gal $\beta$ 1-4GlcNAc $\beta$ 1-3Gal $\beta$ 1-4GlcNAc $\beta$ -APE-HSA                                                         |
|       | Lactose                      | Gal $\beta$ 1-4Glc $\beta$ - BSA                                                                                                                                 |
|       | LeA                          | Gal $\beta$ 1-3[Fuca1-4]GlcNAc $\beta$ 1-3Gal $\beta$ 1-4Glc $\beta$ - BSA                                                                                       |
|       | LeB                          | Fuca $\alpha$ 1-2Gal $\beta$ 1-3[Fuca $\alpha$ 1-4]GlcNAc $\beta$ 1-3Gal $\beta$ 1-4Glc $\beta$ -BSA                                                             |
|       | LeC                          | Gal $\beta$ 1-3GlcNAc $\beta$ - BSA                                                                                                                              |
|       | LeX (dimeric)                | Gal $\beta$ 1-4[Fuca $\alpha$ 1-3]GlcNAc $\beta$ 1-3Gal $\beta$ 1-4(Fuca $\alpha$ 1-3)GlcNAc $\beta$ 1-3Gal $\beta$ 1-APE-BSA                                    |
|       | LeX (monomeric)              | Gal $\beta$ 1-4[Fuca $\alpha$ 1-3]GlcNAc-APD-HSA                                                                                                                 |
|       | LeY                          | Fuca $\alpha$ 1-2Gal $\beta$ 1-4[Fuca $\alpha$ 1-3]GlcNAc -HSA                                                                                                   |
|       | LNH - 13                     | Galb1-4GlcNAcb1-6(Galb1-3GlcNAcb1-3)Galb1-4Glc (13/BSA)                                                                                                          |
|       | LNnH - 11                    | Galb1-4GlcNAcb1-6(Galb1-4GlcNAcb1-3)Galb1-4Glc (11/BSA)                                                                                                          |
|       | LNnT                         | Gal $\beta$ 1-4GlcNAc $\beta$ 1-3Gal $\beta$ 1-BSA (14/BSA)                                                                                                      |
|       | LNnT - 04                    | Gal $\beta$ 1-4GlcNAc $\beta$ 1-3Gal $\beta$ 1-BSA (4/BSA)                                                                                                       |
|       | LNT - 05                     | Gal $\beta$ 1-3GlcNAc $\beta$ 1-3Gal $\beta$ -BSA (5/BSA)                                                                                                        |
|       | LNT - 20                     | Gal $\beta$ 1-3GlcNAc $\beta$ 1-3Gal $\beta$ -BSA (20/BSA)                                                                                                       |
|       | LSTa                         | Sia $\alpha$ 2-3Gal $\beta$ 1-3GlcNAc $\beta$ 1-3Gal $\beta$ 1-BSA                                                                                               |
|       | LSTb                         | Gal $\beta$ 1-3(Sia $\alpha$ 2-6)GlcNAc $\beta$ 1-3Gal $\beta$ 1-BSA                                                                                             |
|       | LSTc                         | Sia $\alpha$ 2-6Gal $\beta$ 1-3GlcNAc $\beta$ 1-3Gal $\beta$ 1-BSA                                                                                               |
|       | Maltopentaose                | Glc $\alpha$ 1-4Glc $\alpha$ 1-4Glc $\alpha$ 1-4Glc $\alpha$ 1-4Glc $\alpha$ -BSA                                                                                |
|       | Maltose                      | Glc $\alpha$ 1-4Glc $\beta$ -BSA                                                                                                                                 |
|       | Man3                         | Man $\alpha$ 1-6(Man $\alpha$ 1-3)Man $\beta$ 1-4GlcNAc -BSA                                                                                                     |
|       | Man5                         | Man $\alpha$ 1-6(Man $\alpha$ 1-3)Man $\alpha$ 1-6(Man $\alpha$ 1-3)Man $\beta$ 1-4GlcNAc-BSA                                                                    |
|       | Man6                         | Man $\alpha$ 1-2Man $\alpha$ 1-3Man $\alpha$ 1-6(Man $\alpha$ 1-2Man $\alpha$ 1-3)Man $\beta$ 1-4GlcNAc-BSA                                                      |
|       | Man7D1                       | Man $\alpha$ 1-6(Man $\alpha$ 1-3)Man $\alpha$ 1-6(Man $\alpha$ 1-2Man $\alpha$ 1-2Man $\alpha$ 1-3)Man $\beta$ 1-4GlcNAc-BSA                                    |
|       | Man7D3                       | Man $\alpha$ 1-2Man $\alpha$ 1-6(Man $\alpha$ 1-3)Man $\alpha$ 1-6(Man $\alpha$ 1-2Man $\alpha$ 1-3)Man $\beta$ 1-4GlcNAc-BSA                                    |
|       | Man8D1D3                     | Man $\alpha$ 1-2Man $\alpha$ 1-6(Man $\alpha$ 1-3)Man $\alpha$ 1-6(Man $\alpha$ 1-2Man $\alpha$ 1-2Man $\alpha$ 1-3)Man $\beta$ 1-4GlcNAc-BSA                    |
|       | Man9                         | Man $\alpha$ 1-2Man $\alpha$ 1-6(Man $\alpha$ 1-2Man $\alpha$ 1-3)Man $\alpha$ 1-6(Man $\alpha$ 1-2Man $\alpha$ 1-2Man $\alpha$ 1-3)Man $\beta$ 1-4GlcNAc-BSA    |
|       | Man-a                        | Man- $\alpha$ - BSA                                                                                                                                              |
|       | Man $\alpha$ 1-6Man-a        | Man $\alpha$ 1-6Man- $\alpha$ - BSA                                                                                                                              |
|       | Manb4                        | Man $\beta$ 1-4Man $\beta$ 1-4Man $\beta$ 1-4Man $\beta$ 1-BSA                                                                                                   |
|       | ManT                         | Man $\alpha$ 1-6[Man $\alpha$ 1-3]Man $\beta$ -BSA                                                                                                               |
|       | NA2                          | Gal $\beta$ 1-4GlcNAc $\beta$ 1-2Man $\alpha$ 1-6[Galb1-4GlcNAcb1-2Man $\alpha$ 1-3]Man $\beta$ 1-4GlcNAc -BSA                                                   |
|       | NA3                          | Gal $\beta$ 1-4GlcNAc $\beta$ 1-2Man $\alpha$ 1-6[Galb1-4GlcNAcb1-2(Galb1-4GlcNAcb1-2)Man $\alpha$ 1-3]Man $\beta$ 1-4GlcNAc -BSA                                |
|       | NA4                          | Gal $\beta$ 1-4GlcNAc $\beta$ 1-2(Galb1-4GlcNAcb1-6)Man $\alpha$ 1-6[Galb1-4GlcNAcb1-2(Galb1-4GlcNAcb1-4)Man $\alpha$ 1-3]Man $\beta$ 1-4GlcNAc -BSA             |
|       | NGA2                         | GlcNAc $\beta$ 1-2Man $\alpha$ 1-6(GlcNAcb1-2Man $\alpha$ 1-3)Man $\beta$ 1-4GlcNAc -BSA                                                                         |
|       | NGA2B                        | GlcNAc $\beta$ 1-2Man $\alpha$ 1-6(GlcNAcb1-2Man $\alpha$ 1-3)(GlcNAcb1-4)Man $\beta$ 1-4GlcNAc -BSA                                                             |
|       | NGA3                         | GlcNAc $\beta$ 1-2Man $\alpha$ 1-6[GlcNAcb1-2(GlcNAcb1-4)Man $\alpha$ 1-3]Man $\beta$ 1-4GlcNAc -BSA                                                             |
|       | NGA3B                        | GlcNAc $\beta$ 1-2Man $\alpha$ 1-6[GlcNAcb1-2(GlcNAcb1-4)Man $\alpha$ 1-3][GlcNAc $\beta$ 1-4]Man $\beta$ 1-4GlcNAc-BSA                                          |
|       | NGA4                         | GlcNAc $\beta$ 1-2(GlcNAc $\beta$ 1-6)Man $\alpha$ 1-6[GlcNAcb1-2(GlcNAcb1-4)Man $\alpha$ 1-3]Man $\beta$ 1-4GlcNAc-BSA                                          |
|       | NGA4(B)2                     | GlcNAc $\beta$ 1-2(GlcNAc $\beta$ 1-4)(GlcNAc $\beta$ 1-6)Man $\alpha$ 1-6[GlcNAcb1-2Man $\alpha$ 1-3][GlcNAc $\beta$ 1-4]Man $\beta$ 1-4GlcNAc -BSA             |
|       | NGA5B                        | GlcNAc $\beta$ 1-2(GlcNAc $\beta$ 1-4)(GlcNAc $\beta$ 1-6)Man $\alpha$ 1-6[GlcNAcb1-2(GlcNAcb1-4)Man $\alpha$ 1-3][GlcNAc $\beta$ 1-4]Man $\beta$ 1-4GlcNAc -BSA |

| Group                                 | Abbreviation              | Description                                                                                           |                                                                            |
|---------------------------------------|---------------------------|-------------------------------------------------------------------------------------------------------|----------------------------------------------------------------------------|
|                                       | P1                        | Gal $\alpha$ 1-4Gal $\beta$ 1-4GlcNAc-BSA                                                             |                                                                            |
|                                       | Pk or Gb3                 | Gal $\alpha$ 1-4Gal $\beta$ 1-4Glc-HSA                                                                |                                                                            |
|                                       | pLNH                      | Gal $\beta$ 1-3GlcNAc $\beta$ 1-3Gal $\beta$ 1-4GlcNAc $\beta$ 1-3Gal $\beta$ 1-BSA (21/BSA)          |                                                                            |
|                                       | pLNH - 07                 | Gal $\beta$ 1-3GlcNAc $\beta$ 1-3Gal $\beta$ 1-4GlcNAc $\beta$ 1-3Gal $\beta$ 1-BSA (7/BSA)           |                                                                            |
|                                       | Rha-a                     | Rha- $\alpha$ – BSA                                                                                   |                                                                            |
|                                       | Rha-b                     | Rha- $\beta$ - BSA                                                                                    |                                                                            |
|                                       | Sialyl LeA                | Sia $\alpha$ 2-3Gal $\beta$ 1-3[Fuc $\alpha$ 1-4]GlcNAc $\beta$ 1-3Gal $\beta$ 1-APD-HSA              |                                                                            |
|                                       | Sialyl LeX                | Sialyl $\alpha$ 2-3Gal $\beta$ 1-4[Fuc $\alpha$ 1-3]GlcNAc – BSA                                      |                                                                            |
|                                       | X3Glc3                    | Xyl $\alpha$ 1-6Glc $\beta$ 1-4(Xyl $\alpha$ 1-6)Glc $\beta$ 1-4(Xyl $\alpha$ 1-6)Glc $\beta$ 1-BSA   |                                                                            |
|                                       | Xyl $\beta$ 4             | Xyl $\beta$ 1-4Xyl $\beta$ 1-4Xyl $\beta$ 1-4Xyl $\beta$ 1-BSA                                        |                                                                            |
| Glycoproteins                         | AGE30                     | Advanced glycation endproducts from glucose day 30                                                    |                                                                            |
|                                       | AGE60                     | Advanced glycation endproducts from glucose day 60                                                    |                                                                            |
|                                       | AGE90                     | Advanced glycation endproducts from glucose day 90                                                    |                                                                            |
|                                       | Alpha-1-acid glycoprotein | alpha1 Acid Glycoprotein                                                                              |                                                                            |
|                                       | Alpha-fetoprotein         | alpha fetoprotein                                                                                     |                                                                            |
|                                       | BSM                       | Bovine submaxillary mucin (STn, STF, S-GlcNAc $\beta$ 1-3, ~20% of Sia is acetylated at 7,8, or 9)    |                                                                            |
|                                       | BSM (asialo)              | Asialo-Bovine submaxillary mucin (aBSM, Tn, TF, GlcNAc $\beta$ 1-3GalNAc)                             |                                                                            |
|                                       | BSM (deacetylated)        | Deacetylated-Bovine submaxillary mucin                                                                |                                                                            |
|                                       | BSM (ox)                  | periodate oxidized bovine submaxillary mucin                                                          |                                                                            |
|                                       | CEA                       | carcinoembryonic antigen                                                                              |                                                                            |
|                                       | FABP                      | Fatty Acid Binding Protein                                                                            |                                                                            |
|                                       | fetuin                    | fetuin (Sia2-3LacNAc, Sia2-6LacNAc, SiaLeC, STF)                                                      |                                                                            |
|                                       | fetuin (asialo)           | asialofetuin (Galb1-4GlcNAc, Galb1-3GlcNAc, Galb1-3GalNAc)                                            |                                                                            |
|                                       | Fetuin (ox)               | periodate oxidized fetuin                                                                             |                                                                            |
|                                       | glycophorin (asialo)      | asialo-glycophorin A                                                                                  |                                                                            |
|                                       | Glycophorin A             | Glycophorin A                                                                                         |                                                                            |
|                                       | hsp90                     | Heat Shock Protein 90                                                                                 |                                                                            |
|                                       | KLH                       | Keyhole limpet hemocyanin                                                                             |                                                                            |
|                                       | KLH (oxidized)            | periodate oxidized Keyhole limpet hemocyanin                                                          |                                                                            |
|                                       | OSM                       | Ovine submaxillary mucin (94% STn, 4% TF, 2% Fuca1-2Gal $\beta$ 1-3GalNAc)                            |                                                                            |
|                                       | OSM (asialo)              | asialo-Ovine submaxillary mucin                                                                       |                                                                            |
|                                       | OSM (asialo, enzym)       | enzyme treated asialo-OSM (almost all Tn)                                                             |                                                                            |
|                                       | OSM (enzym)               | enzyme treated Ovine submaxillary mucin (almost all STn)                                              |                                                                            |
|                                       | OSM (ox)                  | periodate oxidized ovine submaxillary mucin                                                           |                                                                            |
|                                       | ovalbumin                 | ovalbumin (56% Man5+Man6)                                                                             |                                                                            |
|                                       | Ovalbumin (ox)            | periodate oxidized ovalbumin                                                                          |                                                                            |
|                                       | PSA                       | Prostate Specific Antigen; human seminal fluid                                                        |                                                                            |
|                                       | Tgl                       | Thyroglobulin                                                                                         |                                                                            |
|                                       | Peptides                  | <a href="#">Ac-A-Tn(Thr)-S-G - 05</a>                                                                 | <a href="#">Ac-Ala-(GalNAc<math>\alpha</math>)Thr-Ser-Gly-Hex (5/BSA)</a>  |
|                                       |                           | <a href="#">Ac-A-Tn(Thr)-S-G - 08</a>                                                                 | <a href="#">Ac-Ala-(GalNAc<math>\alpha</math>)Thr-Ser-Gly-Hex (8/BSA)</a>  |
|                                       |                           | <a href="#">Ac-A-Tn(Thr)-S-G - 23</a>                                                                 | <a href="#">Ac-Ala-(GalNAc<math>\alpha</math>)Thr-Ser-Gly-Hex (23/BSA)</a> |
|                                       |                           | <a href="#">Ac-S-S-S-G</a>                                                                            | <a href="#">Ac-Ser-Ser-Ser-Gly-BSA (24/BSA)</a>                            |
| <a href="#">Ac-S-TF(Ser)-S-G - 04</a> |                           | <a href="#">AcSer-(Gal<math>\beta</math>1-3GalNAc<math>\alpha</math>)Ser-Ser-Gly-Hex-BSA (4/BSA)</a>  |                                                                            |
| <a href="#">Ac-S-TF(Ser)-S-G - 16</a> |                           | <a href="#">AcSer-(Gal<math>\beta</math>1-3GalNAc<math>\alpha</math>)Ser-Ser-Gly-Hex-BSA (16/BSA)</a> |                                                                            |
| <a href="#">Ac-S-TF(Ser)-S-G - 28</a> |                           | <a href="#">AcSer-(Gal<math>\beta</math>1-3GalNAc<math>\alpha</math>)Ser-Ser-Gly-Hex-BSA (28/BSA)</a> |                                                                            |
| <a href="#">Ac-S-Tn(Ser)-S-G - 04</a> |                           | <a href="#">AcSer-(GalNAc<math>\alpha</math>)Ser-Ser-Gly-Hex-BSA (4/BSA)</a>                          |                                                                            |
| <a href="#">Ac-S-Tn(Ser)-S-G - 22</a> |                           | <a href="#">AcSer-(GalNAc<math>\alpha</math>)Ser-Ser-Gly-Hex-BSA (22/BSA)</a>                         |                                                                            |
| <a href="#">Ac-S-Tn(Ser)-S-G - 33</a> |                           | <a href="#">AcSer-(GalNAc<math>\alpha</math>)Ser-Ser-Gly-Hex-BSA (33/BSA)</a>                         |                                                                            |

| Group    | Abbreviation                 | Description                                                                              |
|----------|------------------------------|------------------------------------------------------------------------------------------|
|          | Ac-S-Tn(Thr)-A-G - 04        | Ac-Ser-(GalNAc)Thr-Ala-Gly-Hex (4/BSA)                                                   |
|          | Ac-S-Tn(Thr)-A-G - 08        | Ac-Ser-(GalNAc)Thr-Ala-Gly-Hex (8/BSA)                                                   |
|          | Ac-S-Tn(Thr)-A-G - 22        | Ac-Ser-(GalNAc)Thr-Ala-Gly-Hex (22/BSA)                                                  |
|          | Ac-S-Tn(Thr)-G-G - 03        | Ac-Ser-(GalNAc)Thr-Gly-Gly-Hex (3/BSA)                                                   |
|          | Ac-S-Tn(Thr)-G-G - 07        | Ac-Ser-(GalNAc)Thr-Gly-Gly-Hex (7/BSA)                                                   |
|          | Ac-S-Tn(Thr)-G-G - 19        | Ac-Ser-(GalNAc)Thr-Gly-Gly-Hex (19/BSA)                                                  |
|          | <b>Ac-S-Tn(Thr)-S-G - 04</b> | <b>AcSer-(GalNAc<math>\alpha</math>)Thr-Ser-Gly-Hex-BSA (4/BSA)</b>                      |
|          | <b>Ac-S-Tn(Thr)-S-G - 24</b> | <b>AcSer-(GalNAc<math>\alpha</math>)Thr-Ser-Gly-Hex-BSA (24/BSA)</b>                     |
|          | Ac-S-Tn(Thr)-S-G HSA-23      | AcSer-(GalNAc $\alpha$ )Thr-Ser-Gly-Hex-HSA (23/HSA)                                     |
|          | Ac-S-Tn(Thr)-S-G HSA-04      | AcSer-(GalNAc $\alpha$ )Thr-Ser-Gly-Hex-HSA (4/HSA)                                      |
|          | Ac-T-Tn(Thr)-P-G - 04        | Ac-Thr-(GalNAc)Thr-Pro-Gly-Hex (4/BSA)                                                   |
|          | Ac-T-Tn(Thr)-P-G - 08        | Ac-Thr-(GalNAc)Thr-Pro-Gly-Hex (8/BSA)                                                   |
|          | Ac-T-Tn(Thr)-P-G - 21        | Ac-Thr-(GalNAc)Thr-Pro-Gly-Hex (21/BSA)                                                  |
|          | Ac-TF(Ser)-G - 04            | Ac(Gal $\beta$ 1-3GalNAc $\alpha$ )Ser-Gly-Hex-BSA (4/BSA)                               |
|          | Ac-TF(Ser)-G - 24            | Ac(Gal $\beta$ 1-3GalNAc $\alpha$ )Ser-Gly-Hex-BSA (24/BSA)                              |
|          | Ac-V-Tn(Thr)-S-G - 04        | Ac-Val-(GalNAc)Thr-Ser-Gly-Hex (4/BSA)                                                   |
|          | Ac-V-Tn(Thr)-S-G - 08        | Ac-Val-(GalNAc)Thr-Ser-Gly-Hex (8/BSA)                                                   |
|          | Ac-V-Tn(Thr)-S-G - 19        | Ac-Val-(GalNAc)Thr-Ser-Gly-Hex (19/BSA)                                                  |
|          | Tn3 - 03                     | Ac(GalNAc $\alpha$ )Ser-(GalNAc $\alpha$ )Ser-(GalNAc $\alpha$ )Ser-Gly-Hex-BSA (3/BSA)  |
|          | Tn3 - 15                     | Ac(GalNAc $\alpha$ )Ser-(GalNAc $\alpha$ )Ser-(GalNAc $\alpha$ )Ser-Gly-Hex-BSA (15/BSA) |
|          | Tn3 - 27                     | Ac(GalNAc $\alpha$ )Ser-(GalNAc $\alpha$ )Ser-(GalNAc $\alpha$ )Ser-Gly-Hex-BSA (27/BSA) |
|          | Ac-Tn(Thr)-G                 | Ac(GalNAc $\alpha$ )Thr-Gly-Hex-BSA (21/BSA)                                             |
| Controls | BSA                          | Bovine serum albumin                                                                     |
|          | BSA-#2                       | Bovine serum albumin                                                                     |
|          | Cy3                          | Cy3-BSA (20 $\mu$ g/mL + BSA, 125 $\mu$ g/mL total)                                      |
|          | Cy5                          | Cy5-BSA (30 $\mu$ g/mL+ BSA, 125 $\mu$ g/mL total)                                       |
|          | HSA                          | Human serum albumin (isolated from serum)                                                |
|          | HSA (recomb)                 | human serum albumin (recombinant)                                                        |

<sup>1</sup> Array components listed in figure 2 of the main paper are shown in blue.

## Linkers

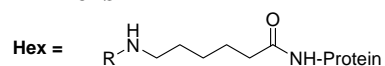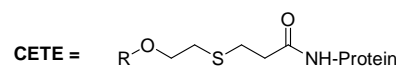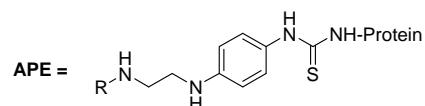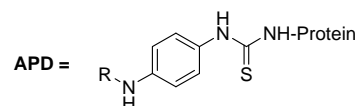

**Table S2. Microarray data for rabbit serum (1:2000)**

| <b>Name</b>                 | <b>Rabbit1</b> | <b>Rabbit2</b> | <b>Rabbit3</b> | <b>Rabbit4</b> |
|-----------------------------|----------------|----------------|----------------|----------------|
| 3'SLacNAc                   | 3              | 3              | 4              | 1              |
| 6'SIac                      | 25             | 82             | 22             | 55             |
| Ac-A-Tn(Thr)-S-G - 05       | 7416           | 7688           | 7880           | 13445          |
| Ac-A-Tn(Thr)-S-G - 08       | 10504          | 9621           | 10545          | 15318          |
| Ac-A-Tn(Thr)-S-G - 23       | 12699          | 11196          | 12885          | 16444          |
| Ac-S-TF(Ser)-S-G - 28       | 7242           | 3034           | 2181           | 2772           |
| Ac-S-TF(Ser)-S-G - 04       | 1333           | 2027           | 509            | 1193           |
| Ac-S-TF(Ser)-S-G - 16       | 5457           | 2933           | 1384           | 2024           |
| Ac-S-Tn(Ser)-S-G - 04       | 2497           | 1193           | 5266           | 10101          |
| Ac-S-Tn(Ser)-S-G - 22       | 8911           | 4844           | 9420           | 16219          |
| Ac-S-Tn(Ser)-S-G - 33       | 9450           | 5340           | 10008          | 16437          |
| Ac-S-Tn(Thr)-A-G - 04       | 9523           | 8338           | 9992           | 15840          |
| Ac-S-Tn(Thr)-A-G - 08       | 10786          | 9149           | 10971          | 15470          |
| Ac-S-Tn(Thr)-A-G - 22       | 13008          | 11356          | 13738          | 16116          |
| Ac-S-Tn(Thr)-G-G - 03       | 12424          | 9949           | 10402          | 14504          |
| Ac-S-Tn(Thr)-G-G - 07       | 12038          | 9844           | 11754          | 15566          |
| Ac-S-Tn(Thr)-G-G - 19       | 12423          | 11036          | 13575          | 16400          |
| Ac-S-Tn(Thr)-S-G - 04       | 11363          | 9127           | 11437          | 15978          |
| Ac-S-Tn(Thr)-S-G - 24       | 14606          | 12784          | 15051          | 16851          |
| Ac-T-Tn(Thr)-P-G - 04       | 677            | 2680           | 2423           | 2396           |
| Ac-T-Tn(Thr)-P-G - 08       | 110            | 3423           | 2293           | 3916           |
| Ac-T-Tn(Thr)-P-G - 21       | 272            | 4985           | 3173           | 7147           |
| Ac-V-Tn(Thr)-S-G - 04       | 1424           | 6394           | 5318           | 10970          |
| Ac-V-Tn(Thr)-S-G - 08       | 2747           | 8589           | 6957           | 12719          |
| Ac-V-Tn(Thr)-S-G - 19       | 4441           | 9997           | 8148           | 14173          |
| Adi - 04                    | 46             | 28             | 29             | 26             |
| Adi - 17                    | 7              | 4              | 68             | 284            |
| AGE30                       | 9              | 3              | 35             | 68             |
| AGE60                       | 5              | 2              | 7              | 10             |
| AGE90                       | 10             | 5              | 11             | 16             |
| Alpha-1-acid glycoprotein   | 1              | 0              | 2              | 2              |
| Alpha-fetoprotein           | 6              | 4              | 3              | 3              |
| alphaGal                    | 0              | 0              | 1              | 1              |
| Ara5                        | 6              | 5              | 2              | 3              |
| Asialo-BSM                  | 2              | 2              | 2              | 3              |
| Asialo-fetuin               | 2              | 3              | 4              | 4              |
| Asialo-glycophorin          | 4              | 2              | 23             | 17             |
| Asialo-OSM                  | 4              | 6              | 9              | 18             |
| Asialo-OSM (enzyme treated) | 5              | 2              | 16             | 17             |
| Bdi                         | 9              | 4              | 9              | 3              |
| BG-A                        | 5              | 2              | 59             | 89             |
| BG-A1                       | 13             | 32             | 20             | 28             |
| BG-B (Dextra)               | 2              | 0              | 2              | 3              |
| BG-B (EMD)                  | 5              | 6              | 3              | 5              |
| BG-H1                       | 40             | 52             | 7              | 23             |
| BG-H2                       | 17             | 17             | 63             | 59             |
| BSA-#1                      | 10             | 7              | 7              | 6              |

| Name                       | Rabbit1 | Rabbit2 | Rabbit3 | Rabbit4 |
|----------------------------|---------|---------|---------|---------|
| BSA-#2                     | 28      | 106     | 972     | 76      |
| BSM                        | 2       | 2       | 2       | 2       |
| BSM (deacetylated)         | 3       | 2       | 2       | 1       |
| BSM (oxidized)             | 6       | 3       | 6       | 4       |
| CEA                        | 3       | 2       | 3       | 3       |
| Cellobiose                 | 48      | 9       | 9       | 8       |
| Cellotriose                | 49      | 18      | 7       | 12      |
| Chito 3                    | 78      | 7       | 103     | 33      |
| Chito 3 - 20               | 48      | 50      | 43      | 52      |
| Cy3                        | 27375   | 26942   | 27492   | 27262   |
| Cy5                        | 222     | 59      | 305     | 122     |
| DSLNT                      | 2       | 1       | 1       | 5       |
| FABP                       | 2       | 2       | 3       | 3       |
| Fetuin                     | 0       | 0       | 1       | 5       |
| Fetuin (oxidized)          | 0       | 0       | 2       | 5       |
| Forssman Di - 04           | 8       | 8       | 8       | 11      |
| Forssman Di - 21           | 5       | 1       | 13      | 23      |
| Forssman Di - 31           | 65      | 44      | 231     | 67      |
| Fuc-a - 04                 | 10      | 5       | 10      | 13      |
| Fuc-a - 22                 | 89      | 6       | 18      | 10      |
| Fuc-b - 04                 | 0       | 7       | 4       | 4       |
| Fuc-b - 21                 | 9       | 4       | 19      | 8       |
| G2M4                       | 3       | 1       | 3       | 4       |
| GA1 - 06                   | 15      | 12      | 20      | 19      |
| GA1 - 20                   | 1       | 0       | 2       | 3       |
| GA1di                      | 20      | 24      | 15      | 13      |
| GA2di - 04                 | 15      | 15      | 14      | 9       |
| GA2di - 16                 | 6       | 2       | 5       | 4       |
| GA2di - 37                 | 54      | 46      | 152     | 300     |
| GA2di (accurate)           | 27      | 20      | 40      | 437     |
| Gal3                       | 5       | 1       | 14      | 11      |
| Gal-a                      | 8       | 4       | 10      | 91      |
| Gala1-4Galb                | 32      | 7       | 108     | 634     |
| Gal-b                      | 6       | 3       | 14      | 82      |
| Galb1-6Man-a               | 5       | 3       | 6       | 5       |
| GalNAc-a - 04              | 144     | 128     | 380     | 813     |
| GalNAc-a - 22              | 8       | 23      | 112     | 3396    |
| GalNAca1-6Galb - 04        | 44      | 31      | 22      | 21      |
| GalNAca1-6Galb - 21        | 9       | 15      | 256     | 90      |
| GalNAc-b                   | 7       | 3       | 6       | 15      |
| Gb4                        | 172     | 16      | 344     | 1903    |
| Glc-a                      | 15      | 7       | 18      | 23      |
| Glca1-6Glca1-4Glca1-4Glc-b | 5       | 2       | 6       | 9       |
| Glc-b                      | 15      | 18      | 28      | 16      |
| GlcNAca1-4Galb - 03        | 0       | 0       | 33      | 2       |
| GlcNAca1-4Galb - 20        | 8       | 3       | 12      | 22      |
| GlcNAc-b                   | 6       | 4       | 8       | 18      |
| Glycophorin                | 3       | 2       | 16      | 12      |
| GM1                        | 51      | 67      | 157     | 233     |

| Name                      | Rabbit1 | Rabbit2 | Rabbit3 | Rabbit4 |
|---------------------------|---------|---------|---------|---------|
| GM3                       | 46      | 53      | 30      | 37      |
| HSA (isolated from serum) | 63      | 117     | 16      | 9       |
| hsp90                     | 1       | 2       | 3       | 2       |
| Isomaltose                | 5       | 3       | 3       | 5       |
| KLH                       | 7       | 123     | 5       | 4       |
| KLH (oxidized)            | 4       | 4       | 4       | 4       |
| LacNAc                    | 7       | 5       | 4       | 3       |
| LacNAc (trimeric)         | 13      | 25      | 9       | 90      |
| Lactose                   | 135     | 92      | 644     | 262     |
| LeA                       | 21      | 2       | 37      | 34      |
| LeB                       | 5       | 2       | 26      | 7       |
| LeC                       | 5       | 3       | 13      | 7       |
| LeX (dimeric)             | 3       | 1       | 4       | 39      |
| LeX (monomeric)           | 25      | 21      | 21      | 7       |
| LeY                       | 17      | 67      | 15      | 48      |
| LNH - 13                  | 1       | 0       | 1       | 4       |
| LNnH - 11                 | 2       | 1       | 3       | 2       |
| LNnT                      | 4       | 1       | 16      | 4       |
| LNnT - 04                 | 4       | 1       | 6       | 11      |
| LNT - 05                  | 32      | 21      | 20      | 21      |
| LNT - 20                  | 1       | 0       | 0       | 2       |
| LSTa                      | 1       | 1       | 0       | 1       |
| LSTb                      | 2       | 2       | 3       | 3       |
| LSTc                      | 1       | 3       | 4       | 3       |
| Maltopentaose             | 2       | 1       | 1       | 2       |
| Maltose                   | 7       | 6       | 6       | 6       |
| Man3                      | 5       | 2       | 15      | 30      |
| Man5                      | 2       | 1       | 10      | 12      |
| Man6                      | 3       | 1       | 13      | 19      |
| Man7D1                    | 1       | 1       | 3       | 3       |
| Man7D3                    | 2       | 1       | 6       | 5       |
| Man8D1D3                  | 1       | 0       | 0       | 1       |
| Man9                      | 3       | 0       | 10      | 10      |
| Man-a                     | 262     | 6       | 9       | 10      |
| Mana1-6Man-a              | 7       | 4       | 3       | 2       |
| Manb4                     | 5       | 3       | 2       | 6       |
| ManT                      | 5       | 2       | 5       | 5       |
| NA2                       | 180     | 87      | 38      | 133     |
| NA3                       | 45      | 22      | 20      | 75      |
| NA4                       | 81      | 51      | 34      | 143     |
| NGA2                      | 25      | 15      | 16      | 57      |
| NGA2B                     | 28      | 18      | 18      | 71      |
| NGA3                      | 59      | 39      | 29      | 83      |
| NGA3B                     | 45      | 24      | 23      | 74      |
| NGA4                      | 36      | 24      | 20      | 60      |
| NGA4(B)2                  | 35      | 17      | 20      | 49      |
| NGA5B                     | 32      | 19      | 18      | 49      |
| OSM                       | 3       | 3       | 1       | 1       |
| OSM (enzyme treated)      | 3       | 2       | 16      | 19      |



| Name                 | Rabbit1 | Rabbit2 | Rabbit3 | Rabbit4 |
|----------------------|---------|---------|---------|---------|
| OSM (oxidized)       | 0       | 1       | 9       | 4       |
| Ovalbumin            | 1       | 2       | 3       | 8       |
| Ovalbumin (oxidized) | 6       | 2       | 4       | 4       |
| P1                   | 84      | 384     | 176     | 705     |
| Pk or Gb3            | 102     | 323     | 39      | 41      |
| pLNH - 07            | 6       | 2       | 11      | 4       |
| pLNH - 21            | 4       | 3       | 2       | 8       |
| PSA                  | 2       | 2       | 2       | 3       |
| Rha-a                | 62      | 15      | 15      | 45      |
| Rha-b                | 17      | 5       | 10      | 9       |
| rHSA                 | 61      | 112     | 54      | 77      |
| Sialyl LeA           | 9       | 18      | 8       | 13      |
| Sialyl LeX           | 7       | 12      | 5       | 7       |
| Ac-S-S-S-G           | 709     | 341     | 974     | 1866    |
| S-Tn(Thr)-S-G HSA-23 | 10478   | 9310    | 10755   | 14794   |
| S-Tn(Thr)-S-G HSA-04 | 13784   | 12132   | 14085   | 16429   |
| TF(Ser)-G - 04       | 567     | 240     | 113     | 585     |
| TF(Ser)-G - 24       | 195     | 110     | 50      | 179     |
| Tgl                  | 2       | 1       | 1       | 1       |
| Tn                   | 103     | 892     | 1096    | 5069    |
| Tn3 - 03             | 5       | 8       | 952     | 523     |
| Tn3 - 15             | 9       | 19      | 2396    | 876     |
| Tn3 - 27             | 197     | 117     | 2408    | 1221    |
| X3Glc3               | 3       | 3       | 2       | 2       |
| Xylb4                | 7       | 12      | 5       | 4       |

**Table S3. Percentage of inhibition by BSA-conjugates**

**Inhibited with Ac-S-Tn(Thr)-S-G-04**

|                       | Rabbit 1 | Rabbit 2 | Rabbit 3 | Rabbit 4 |
|-----------------------|----------|----------|----------|----------|
| Ac-S-Tn(Thr)-S-G - 04 | 100      | 99       | 99       | 98       |
| Ac-S-Tn(Thr)-S-G - 24 | 99       | 94       | 91       | 91       |
| Ac-S-S-S-G            | 100      | 60       | 93       | 96       |
| Tn3 - 27              | ND       | ND       | 100      | 100      |

**Inhibited with Ac-S-Tn(Thr)-S-G-24**

|                       | Rabbit 1 | Rabbit 2 | Rabbit 3 | Rabbit 4 |
|-----------------------|----------|----------|----------|----------|
| Ac-S-Tn(Thr)-S-G - 04 | 100      | 100      | 100      | 100      |
| Ac-S-Tn(Thr)-S-G - 24 | 100      | 99       | 99       | 98       |
| Ac-S-S-S-G            | 100      | 93       | 99       | 99       |
| Tn3 - 27              | ND       | ND       | 100      | 100      |

**Inhibited with Ac-S-S-S-G**

|                       | Rabbit 1 | Rabbit 2 | Rabbit 3 | Rabbit 4 |
|-----------------------|----------|----------|----------|----------|
| Ac-S-Tn(Thr)-S-G - 04 | 7        | 0        | 11       | 0        |
| Ac-S-Tn(Thr)-S-G - 24 | 4        | 8        | 8        | 0        |
| Ac-S-S-S-G            | 86       | 57       | 60       | 54       |
| Tn3 - 27              | ND       | ND       | 0        | 0        |

**Inhibited with Tn3-27**

|                       | Rabbit 1 | Rabbit 2 | Rabbit 3 | Rabbit 4 |
|-----------------------|----------|----------|----------|----------|
| Ac-S-Tn(Thr)-S-G - 04 | 0        | 1        | 16       | 3        |
| Ac-S-Tn(Thr)-S-G - 24 | 4        | 8        | 8        | 0        |
| Ac-S-S-S-G            | 0        | 10       | 21       | 0        |
| Tn3 - 27              | ND       | ND       | 84       | 49       |

**ND: Not detectable**

### Figure S1. MALDI-MS Data for HSA conjugates

(4/HSA: 7 Eq of Ac-S-Tn(Thr)-S-G (1) produced a final average ratio of 4 haptens per HSA)

(23/HSA: 100 Eq of Ac-S-Tn(Thr)-S-G (1) produced a final average ratio of 23 haptens per HSA)

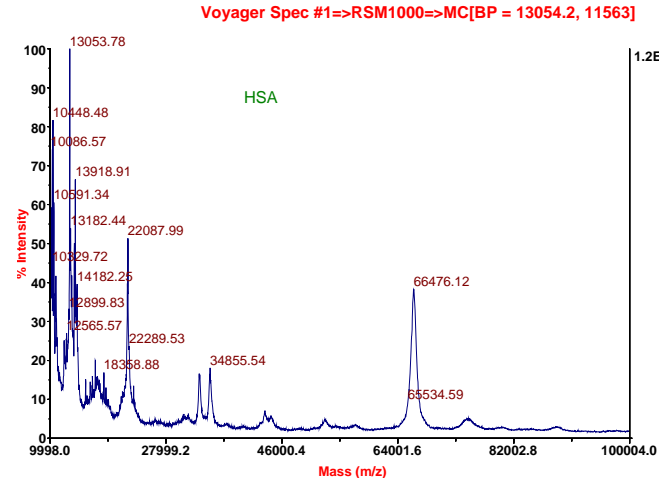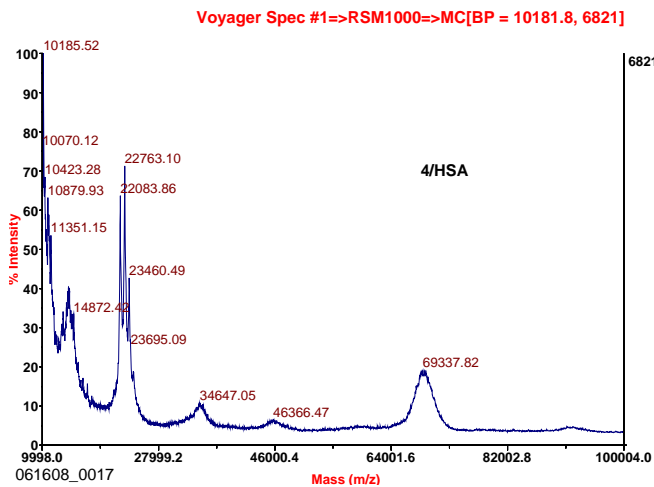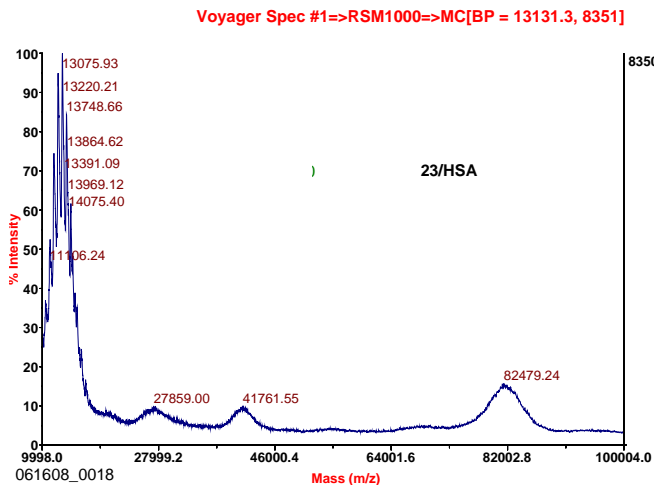

Supplement: NIHMS405772-supplement-supp.pdf [file NIHMS405772-supplement-supp.pdf]
